# Supplementary material for: A Population of Radio-Resistant Macrophages in the Deep Myenteric Plexus Contributes to Postoperative Ileus Via Toll-Like Receptor 3 Signaling
Source: PubMed Central journal article supplement (PMC7838642; doi:10.3389/fimmu.2020.581111), 2021-01-13
Supplement: DataSheet_1.pdf [file DataSheet_1.pdf]

## Supplementary Material

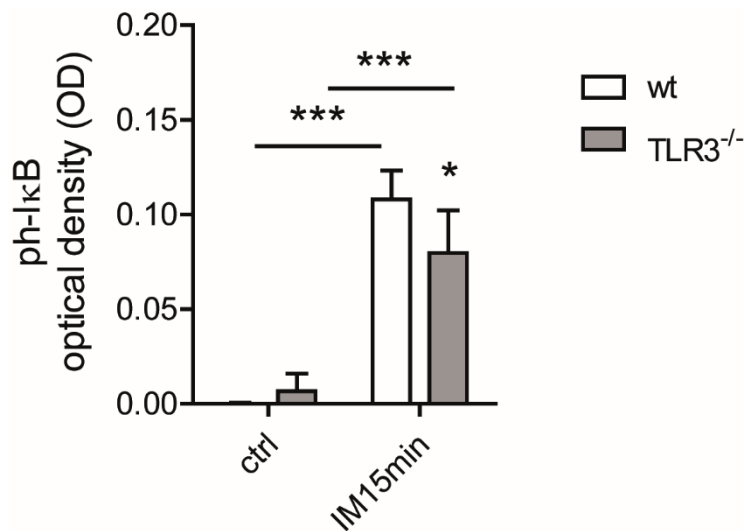

**Supplementary Figure S1.** Wt and TLR3<sup>-/-</sup> underwent IM. ME was isolated 15 min after surgery and snap frozen in liquid nitrogen. Release of ph-IκB was measured with ME RIPA lysates by ELISA following the manufacturer's instructions. n = 6 for all groups. Samples were analyzed by 2-way analysis of variance with Tukey post-hoc test and the results are displayed as means ± SEM. \*p≤0.05, \*\*\*p≤0.001 versus indicated groups.

A

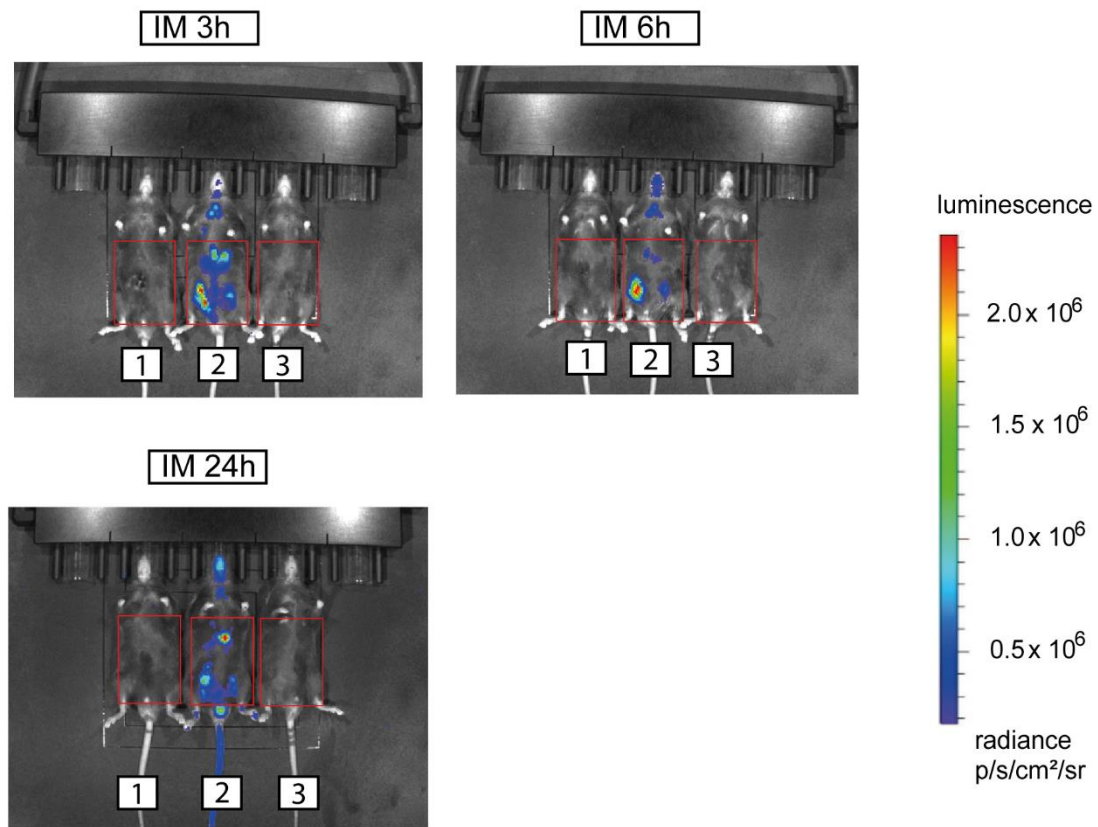

B

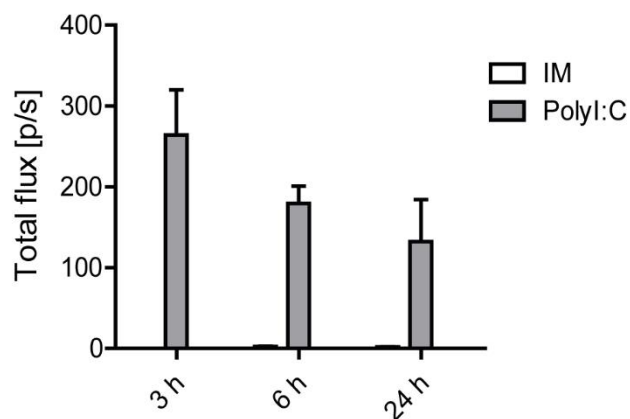

**Supplementary Figure S2.** (A) Bioluminescence was measured in IFN- $\beta$ luc<sup>+/-</sup> (mouse 1 & 2) and wildtype (mouse 3) mice 3, 6 or 24 hrs after IM (mouse 1 and 3) or after i.p. injection of 200 $\mu$ g PolyI:C (mouse 2) using an IVIS 200 system (Caliper LifeSciences) 5 min after i.p. injection of luciferin (50 mM, Caliper Life Sciences) in PBS. (B) Data from dataset A were analyzed using the LivingImage software. n= 3 animals per group, 1 experiment.

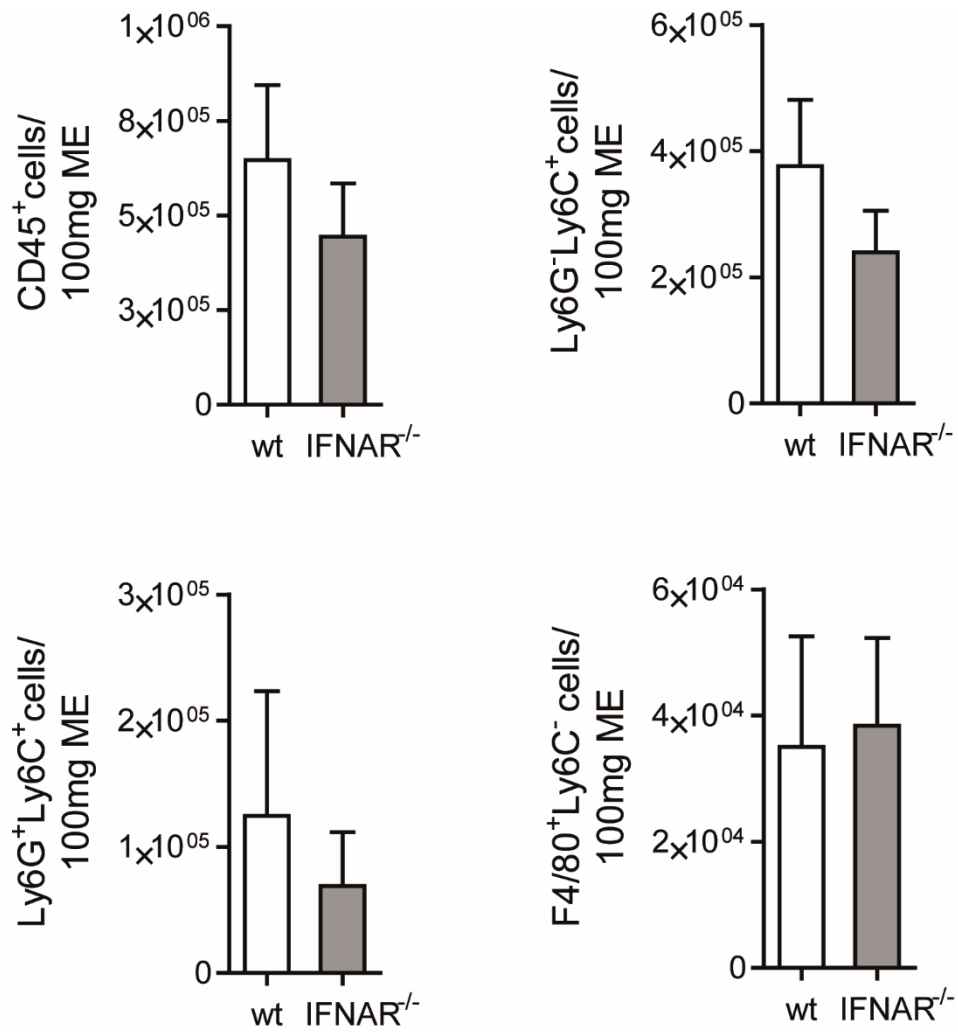

**Supplementary Figure S3.** Wt and IFNAR<sup>-/-</sup> mice underwent IM. In ME 24h after surgery absolute cell counts of CD45<sup>+</sup> leukocytes, Ly6G-Ly6C<sup>+</sup> monocytes, Ly6G<sup>+</sup>Ly6C<sup>+</sup> neutrophils and F4/80<sup>+</sup>Ly6C<sup>-</sup> resident macrophages were analyzed. n = 7 for all groups. Samples were analyzed by student's t-test, and the results are displayed as means ± SEM. \*p≤0.05, \*\*p≤0.01, \*\*\*p≤0.001 versus indicated groups.

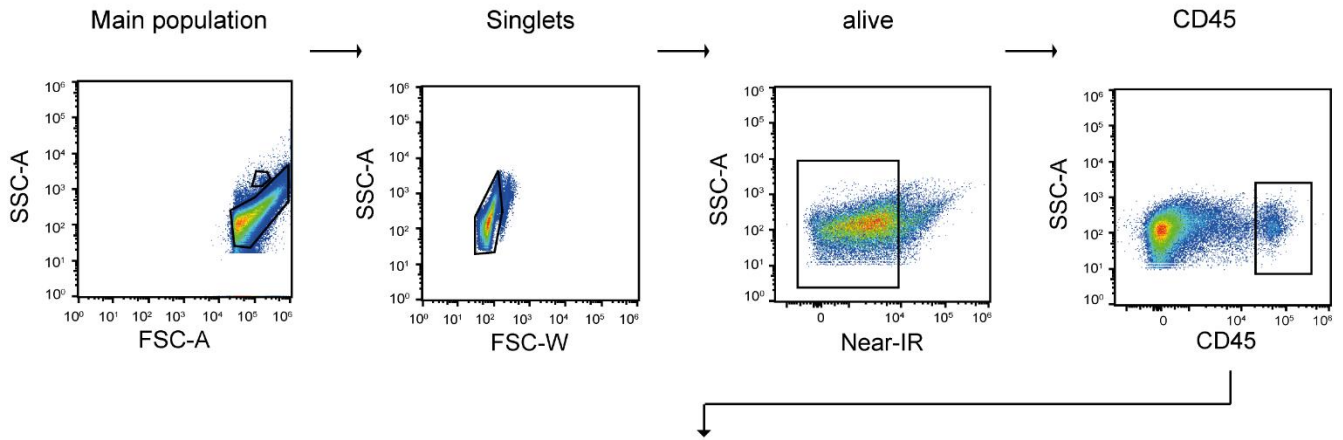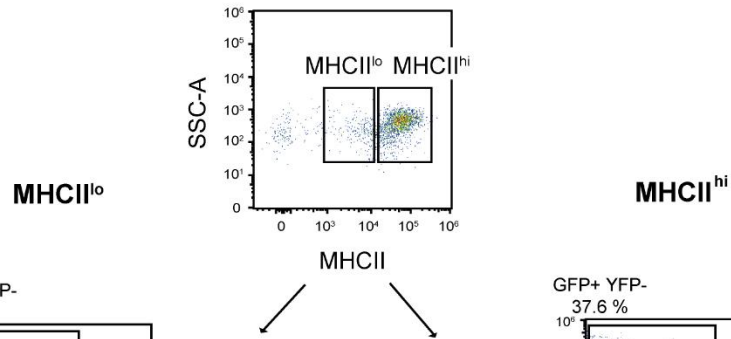

**CX3CR1<sup>GFP/+</sup>**

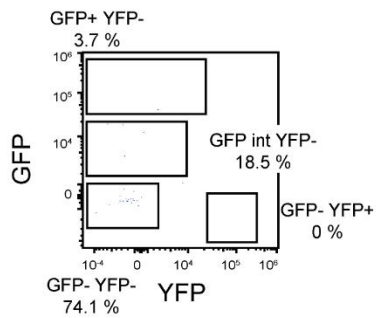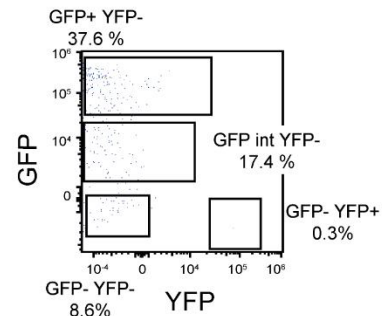

**LysM<sup>cre+</sup>; ROSA26<sup>LSL-eYFP</sup>**

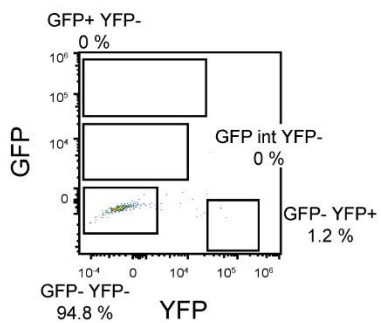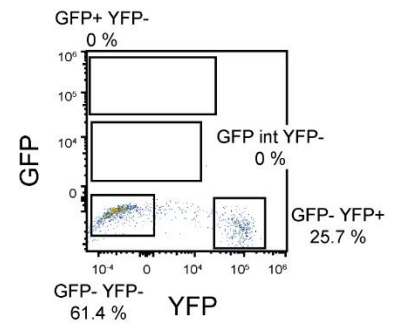

**C57BL6**

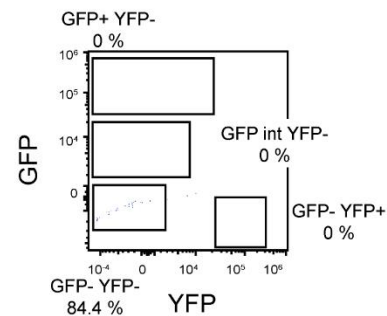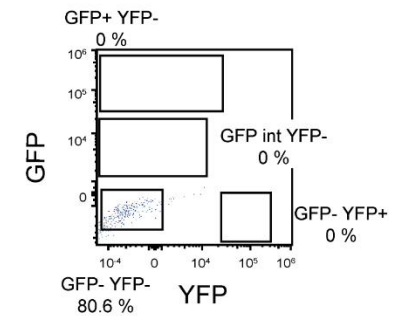

**Supplementary Figure S4.** Representative gating strategy on MHCII expression levels of CD45<sup>+</sup> cells from the ME of CX3CR1<sup>GFP/+</sup> mice, LysM<sup>cre+</sup>;ROSA26<sup>LSL-eYFP</sup> and C57BL6 mice. Note that the majority of the CX3CR1<sup>+</sup> macrophages is present in the MHCII<sup>hi</sup> population. Therefore, we followed this MHCII<sup>hi</sup> population in our further analysis.

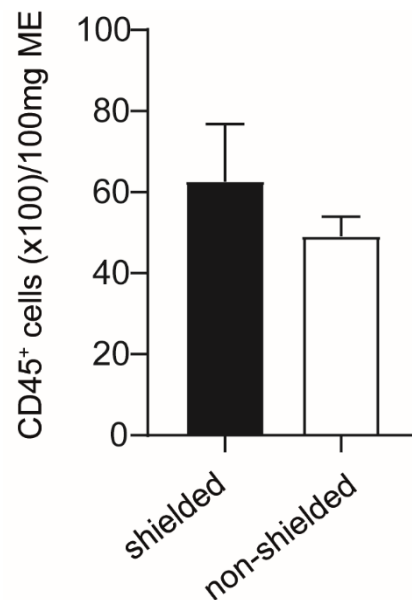

**Supplementary Figure S5.** Lethally irradiated shielded and non-shielded CX3CR1<sup>GFP/+</sup> were recovered 6-7h after radiation with a total of  $1.2 \times 10^7$  bone marrow (BM) cells of LysM<sup>cre+</sup>;ROSA26<sup>LSL-eYFP</sup> donor mice. 6 weeks later, FACS analysis and quantification of total CD45<sup>+</sup> cells in shielded and non-shielded mice was performed. n=3. Samples were analyzed by student's t-test and the results are displayed as means  $\pm$  SEM.

A

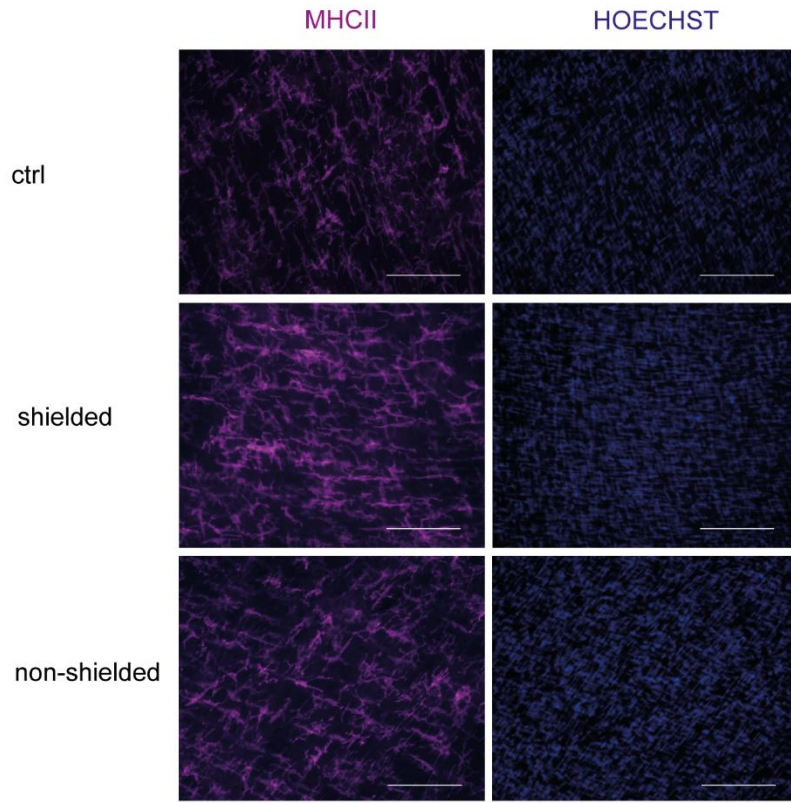

B

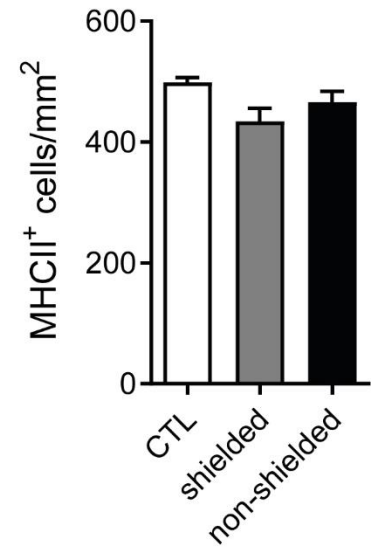

**Supplementary Figure S6.** Immunohistochemical analysis of ileal whole mount specimen in naive controls (ctrl), lethally irradiated shielded and non-shielded CX3CR1<sup>GFP/+</sup> mice that were recovered with a total of  $1.2 \times 10^7$  bone marrow cells of LysM<sup>cre+</sup>;ROSA26<sup>LSL-eYFP</sup> donor mice. 6 weeks later immunohistochemistry was performed. (A) Representative whole mounts were stained with MHCII (purple) and Hoechst (blue), scale bars 100 $\mu$ m and (B) quantification of total MHCII<sup>+</sup> cells was performed. n=3 mice per group. Samples were analyzed by student's t-test and the results are displayed as means  $\pm$  SEM.

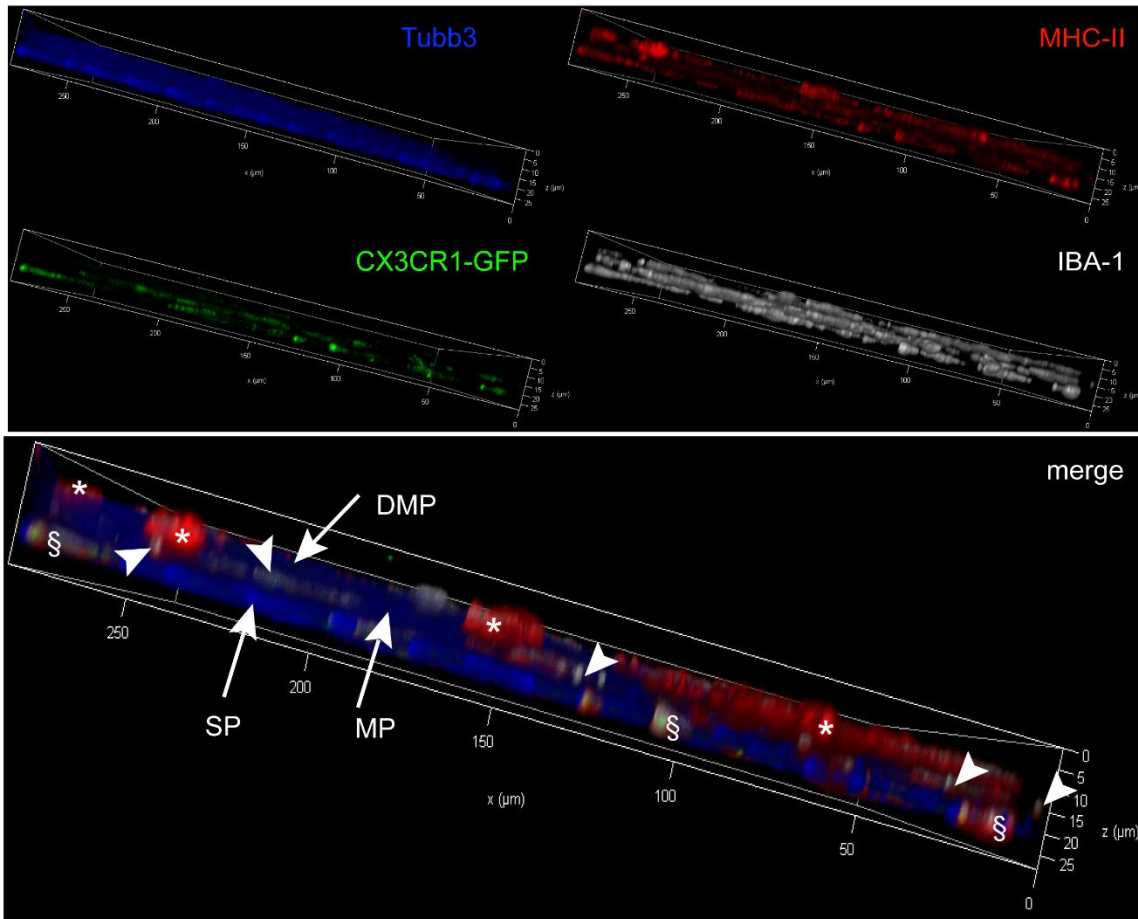

**Supplementary Figure S7.** Representative 3D projection of stainings for  $\beta$ III-tubulin (blue), MHCII (red), GFP (green) and IBA-1 (grey) demonstrating the prominent network of MHCII<sup>+</sup>CX3CR1<sup>+</sup> and MHCII<sup>+</sup>CX3CR1<sup>-</sup> cells located in small intestine whole mounts of the muscularis externa in CX3CR1<sup>GFP/+</sup>. Note that MHCII<sup>+</sup>CX3CR1<sup>-</sup> cells (\*) lay in a different layer, the deep myenteric plexus (DMP), while MHCII<sup>+</sup>CX3CR1<sup>+</sup> cells are located in the myenteric (MP, arrow heads) and serosal (SP, §) plexus. Presence of three individual layers can also be nicely observed in the individual IBA-1 and MHCII stainings while the CX3CR1-GFP staining only shows two cell layers. Notably, all MHCII<sup>+</sup> cells are also IBA-1<sup>+</sup>, indicating that these cells are resident macrophages. (Representative image taken from two individual experiments).

A

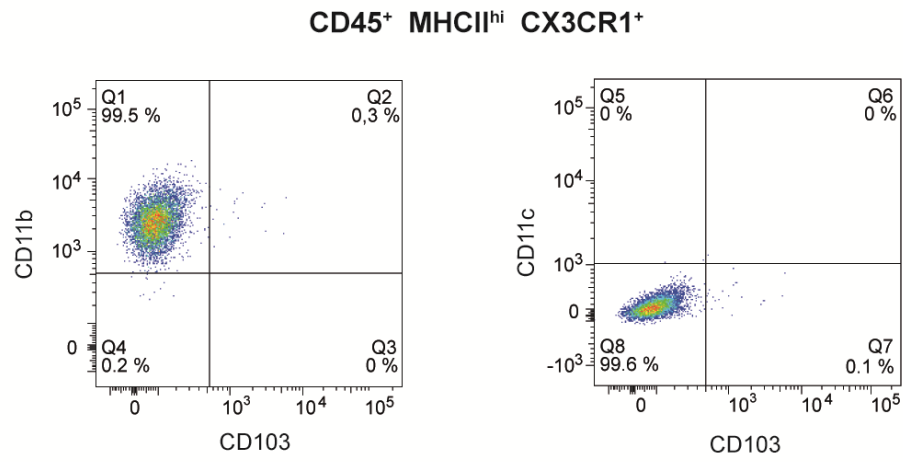

B

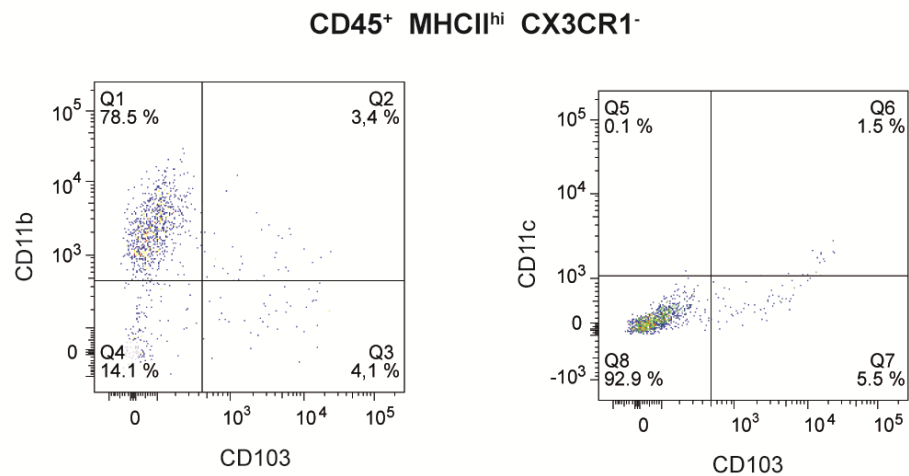

**Supplementary Figure S8.** Representative FACS staining of the expression of CD11b, CD103 and CD11c on (A) Near-IR<sup>-</sup>CD45<sup>+</sup>MHCII<sup>hi</sup>CX3CR1<sup>+</sup> and (B) Near-IR<sup>-</sup>CD45<sup>+</sup>MHCII<sup>hi</sup>CX3CR1<sup>-</sup> gated ME cells of untreated CX3CR1<sup>GFP/+</sup> mice. n = 3 (the ME of 3 mice was pooled for each replicate).



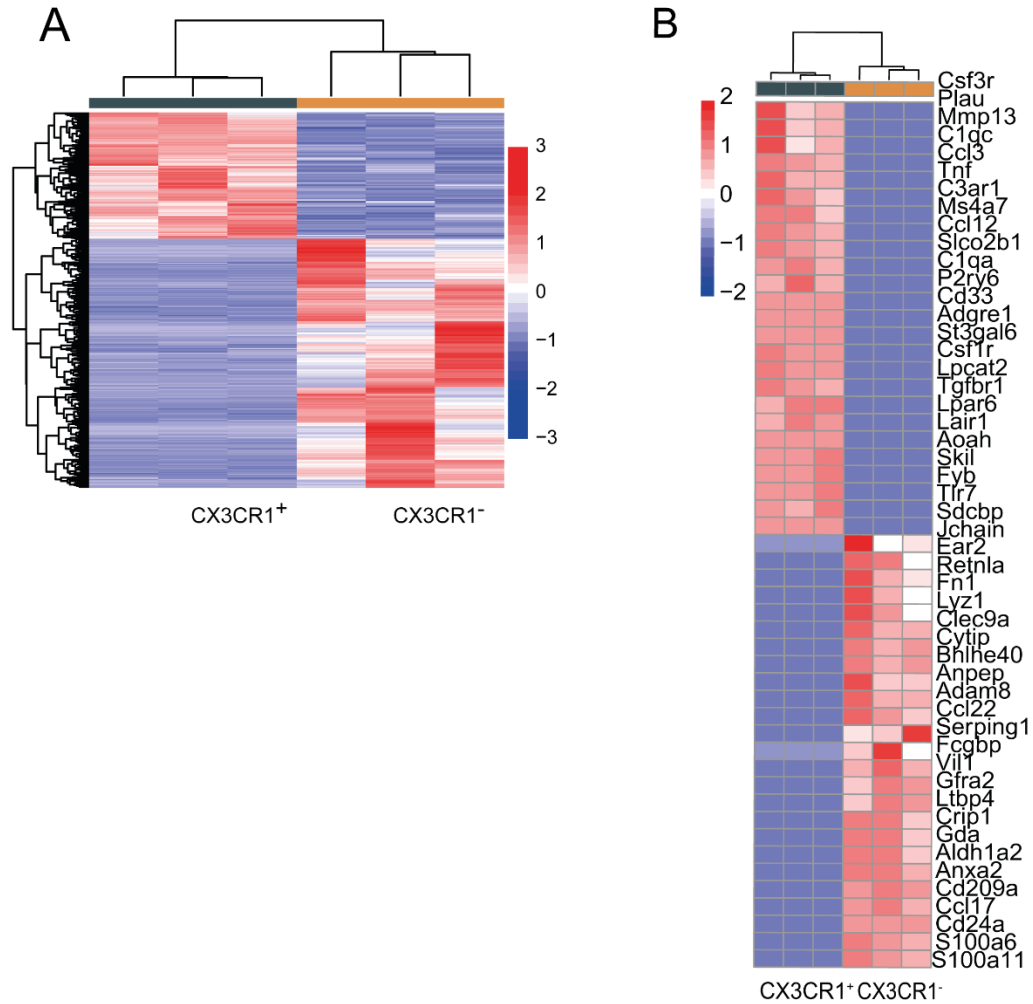

**Supplementary Figure S9.** MHCII<sup>hi</sup>CX3CR1<sup>+</sup> and MHCII<sup>hi</sup>CX3CR1<sup>-</sup> cell populations of the ME of naive CX3CR1<sup>GFP/+</sup> mice were flow cytometry sorted and underwent RNA sequencing. **(A)** Heatmap of the most differentially expressed genes in MHCII<sup>hi</sup>CX3CR1<sup>+</sup> and MHCII<sup>hi</sup>CX3CR1<sup>-</sup> cells (according to the volcano plot in Figure 6b). **(B)** Heatmap of the top 25 signature genes differentially expressed between MHCII<sup>hi</sup>CX3CR1<sup>+</sup> and MHCII<sup>hi</sup>CX3CR1<sup>-</sup> cells.
